# Supplementary material
Source: PubMed Central journal article supplement (PMC9635529)

## **Supplemental Material and Methods**

### **Primograft Samples**

Primograft samples were derived by passaging individual primary patient samples (Ficoll-gradient purified) through NSG (NOD.Cg-Prkdcscid Il2rgtm1Wjl/SzJ) mice (see below).

### **Optical Genome Mapping (Bionano)**

In a retrospective analysis ultra-high molecular weight genomic DNA was extracted from frozen banked cells ( $1.5 \times 10^6$ ) using the Bionano Cell Culture DNA Isolation Kit, nicked and labeled following the instructions of the manufacturer (Dokument 30246 Rev.C sowie Dokument 30206 Rev.F; Bionano Genomics Inc.). The Saphyr Genome Imaging Instrument (Part #90023; Bionano Genomics Inc.) using a Saphyr Chip (Part #20366) was disposed for molecular imaging. The throughput target of the run was set to 2000 Gbp (Gigabases). Single-molecule data was collected, filtered for a minimum size of 150 Kbp and *de novo* genome map assembly was performed. Structural variants were called using the Bionano Variant Annotation Pipeline setting hg19 as reference genome.

### **Isolation and culture of human MSCs from bone marrow**

For studies involving human bone marrow ethical approval from the ethical committee of Hannover Medical School was obtained. Samples were collected in accordance with the Declaration of Helsinki after written informed consent of the respective donors. Isolation and culture of human MSCs was performed as described earlier<sup>18</sup>. Briefly, bone marrow samples were obtained during resection of the femoral head for implantation of a total hip arthroplasty in otherwise healthy donors and isolated

from these samples by density gradient centrifugation and subsequent plastic adhesion of mononuclear cells and cultured as described<sup>18</sup>. MSC preparations were routinely frozen in passage 2 with 95 % (v/v) fetal calf serum/ 5 % (v/v) dimethylsulfoxide and stored at – 140 °C.

### **Cell Culture**

B-lineage lymphoid cell lines BV173 (BCR-ABL+) and 697 (BCR-ABL-) (DSMZ, Brunswick, Germany) were cultured in RPMI 1640 supplemented with 10% FCS and 1% penicillin/streptomycin.

### **Pharmacologic agents**

Venetoclax and dexamethasone were purchased from Selleck Chemicals and solubilized in dimethyl sulfoxid (DMSO) or PBS to 10 mM stock, respectively, and then supplemented to the culture medium at the required concentration. Inotuzumab-ozogamicin was purchased from Pfizer and dissolved in 0.9% NaCl at 0.25mg/mL stock concentration.

### ***Ex vivo* drug treatment and assessment of cytotoxicity**

Primary ALL cells were isolated by Ficoll-gradient density centrifugation and subsequent lysis of erythrocytes by ammonium chloride (0.83%). PDX cells were isolated from bone marrow or spleen of inoculated NSG mice. Primary ALL or PDX cells were co-cultured in flat-bottom 96-well plates (Thermofisher, Darmstadt, Germany) seeded with  $0.4 \times 10^4$  MSCs per well in MSC medium (DMEM low glucose, 20% FCS, 25mM HEPES-buffer, 1% penicillin/streptomycin, 2 ng/mL  $\beta$ FGF-2) 24 hours prior to treatment at an ALL seeding density of  $0.5 \times 10^6$  cells/ml in SFEM II medium (Stemcell technologies, Cambridge, UK) supplemented with 20% FCS, 20 ng/ml recombinant

IL3, 10 ng/ml recombinant IL7 (both Peprotech, Hamburg, Germany) and 1% penicillin/streptomycin. Cells were treated with increasing concentrations of venetoclax, dexamethasone and inotuzumab-ozogamicin alone or in combination in fixed ratios (for primary samples: 1 nM: 1 nM: 0.0067 nM; for PDX samples: 100 nM: 8.43 nM: 0.0029 nM) for 48 hours and subsequent huCD19 antibody (anti-CD19-APC, BioLegend, San Diego, CA, US) and propidium iodide staining (Serva, Heidelberg, Germany) was performed. Cells were analyzed in a FACS Calibur flow cytometer and data were analyzed with Cell-Quest Pro software (BD Bioscience, Heidelberg, Germany). Drug combination indices were calculated using GraphPad Prism (Version 7.04) and CompuSyn Software.

### **MOMP induction**

PDX cells (L707, P020, P021) and cell lines (697 and BV173) were treated for three hours with venetoclax, dexamethasone or inotuzumab-ozogamicin at a density of  $0.5-1 \times 10^6$  cells/ml. Concentrations were selected to achieve at least 30% PI-positive cells after 24 hours of treatment. Detailed dosing information is provided in the corresponding figure legends. Assessment of mitochondrial outer membrane permeabilization was performed as described earlier<sup>7</sup>. In brief, cells were stained with 50 nM of the mitochondrial dye TMRE (tetramethylrhodamine ethyl ester) (Sigma) for 20 minutes at 37°C. 5  $\mu$ M FCCP (Carbonyl cyanide-4-(trifluoromethoxy)-phenylhydrazone) (Sigma) served as a positive destaining control. Cells were analyzed in a FACS Calibur flow cytometer and data were analyzed with Cell-Quest Pro software (BD Bioscience). Reduction of TMRE mean fluorescence of viable cells (FSC/SSC) was analyzed. Untreated controls were set as 100%.

697, BV173 and L707 (in co-culture with MSC, see above) with or without 21 hours of pretreatment with dexamethasone (697:5  $\mu$ M, BV173:0.2  $\mu$ M, L707:2  $\mu$ M) or ino-

tuzumab-ozogamicin (697 and BV173: 100 ng/ml, L707: 500 ng/ml) were treated with 100 nM of venetoclax for 3 hours. TMRE staining was performed as described above. Reduction of TMRE mean fluorescence of viable cells was analyzed. Untreated controls were set as 100%.

### **DNA-damage response**

After 6 hours of drug exposure (venetoclax, dexamethasone, inotuzumab-ozogamicin concentrations indicated in the figure legends) PDX cells (L707, P020 or P021) and cells lines (697, BV173) were fixed with 4% paraformaldehyde for 15 minutes at 4°C. Cells were washed in PBS and cell pellets were resuspended in ice cold methanol and stored overnight in -20°C. Cells were washed twice with PBS followed by staining with anti-pATM (pS1981) (#81292, Abcam), anti- $\gamma$ H2AX (pS139) antibody (#560443, BD Biosciences) or anti-cleaved caspase-3 (#9661, Cell Signaling) for 60 minutes in PBS supplemented with 0.5% FCS. Cells were washed with PBS and incubated for 30 minutes with either an APC-conjugated anti-mouse-antibody (BD Bioscience) or an Alexa Fluor 488 conjugated-anti-rabbit antibody (Jackson Immuno Research, Ely, UK) depending on the origin of the primary antibody. Cells were washed with PBS and cell pellets were resuspended in PBS supplemented with 15  $\mu$ g/ml propidium iodide (Serva) and 20  $\mu$ g/ml RNase (Qiagen) (for  $\gamma$ H2AX and pATM staining) or in PBS (for cleaved caspase-3 staining). After 30 minutes of incubation at RT samples were analyzed in a FACS Calibur flow cytometer.

### **Immunoblotting and co-immunoprecipitations**

Whole cell lysates were prepared with lysis buffer (20 mM HEPES, pH 7.5, 0.4 M NaCl; 1 mM EDTA, 1 mM EGTA, 1 mM DTT) supplemented with mini complete protease inhibitor cocktail tablet (Roche Diagnostics, Mannheim, Germany). Immunob-

lotting was performed as described earlier <sup>7</sup> with the following antibodies according to the manufacturer's protocol: anti-p53 (sc-126, Santa Cruz), anti-BIM (cs2933), anti-BAX (cs2772), anti-PUMA (cs4976), anti-GAPDH (cs2118) (all Cell Signaling Technology), and anti-BCL2 (551051, Becton Dickinson). Densitometric analysis was performed using VersaDoc 3000 Imaging system and Image Lab software version 5.0 (both Bio-Rad). The intensity ratio of the protein of interest band to the GAPDH band (loading control) was calculated to measure changes in protein levels.

For co-immunoprecipitation studies, 697 and BV173 cells were treated with 10 ng/ml INO and 5  $\mu$ M DEX (697) or 5 ng/ml INO and 0.5  $\mu$ M DEX (BV173), respectively for 24 hours and subsequently lysed in CHAPS-buffer (50 mM Tris-HCl [pH 7.4], 150 mM NaCl, 1 mM EGTA, 1 mM EDTA, 1% CHAPS) supplemented with mini complete protease inhibitor cocktail tablet on ice for 30 min. Immunoprecipitation was performed as described earlier with anti-BCL2 antibody (AW604, Millipore), and recovered and washed immunoclompexes were subjected to western blot analysis <sup>7</sup>. Quantitative densitometric analysis of co-immunoprecipitations was performed by chemiluminescence imaging of immunoblots using ChemiDoc MP Imaging system (Bio-Rad).

### **Cytotoxicity**

Cytotoxicity was assessed by staining with 10  $\mu$ g/ml propidium iodide after 24 hours or 48 hours of the indicated drug treatment. Cells were analyzed in a FACS Calibur flow cytometer and data were analyzed with Cell-Quest Pro software (BD Bioscience).

### **Animal experiments**

L707 cells were described earlier <sup>13</sup>. For generation of P020 and P021 PDX models, patient samples were transplanted into the tail vein of NSG mice. Leukemia engraftment was monitored by immunophenotyping of peripheral blood. Mice were sacrificed and cells were isolated from bone marrow and subsequently transduced with Chili-Luc lentiviral vector as described earlier <sup>16</sup>. Cells were washed and further passaged in NSG mice. Chili-Luc transduced PDX cells were sorted for RFP expression (Sorter Facility MHH) and adoptively transplanted in NSG mice.

L707, P021 and P020 PDX cells stably expressing luciferase ( $1 \times 10^6$ ) were intravenously transplanted into recipient NSG mice. Upon confirmed engraftment by IVIS bioluminescence imaging <sup>16</sup>, mice were treated with the respective antineoplastic agents. Dexamethasone (1 mg/kg) was applied orally in 0.1 M sodium citrate by oral gavage 5 days per week or in combination with venetoclax in a vehicle consisting of 60% Phosal, 30% PEG 400 and 10% Ethanol with a treatment delay of minimum 2 hours <sup>9</sup>. Inotuzumab-ozogamicin was injected intraperitoneally two days a week for two weeks in a concentration of 100  $\mu\text{g}/\text{kg}$  (L707) in 0.9% NaCl. P020 and P021 were treated once a week for three weeks with 10  $\mu\text{g}/\text{kg}$  (INO<sup>low</sup>) and 100  $\mu\text{g}/\text{kg}$  (INO<sup>high</sup>). Detailed dosing information is indicated in the figure legends. Tumor burden was assessed by *in vivo* bioluminescent assay. D-Luciferin (1 mg/mouse) (AppliChem, Darmstadt, Germany) was provided intraperitoneally. Life imaging of tumor growth was detected every two weeks by using IVIS Lumina II (Perkin Elmer, Waltham, MA, US). Living Image 4.0 software was used to analyze the bioluminescence radiance. Female mice used in the experiments were 8 to 10 weeks old and were randomly allocated to each group.

All animal studies were in accordance with the German animal protection law and with the European Communities Council Directive 86/609/EEC and 2010/63/EU for the protection of animals used for experimental purposes. All experiments were ap-

proved by the Local Institutional Animal Care and Research Advisory Committee and permitted by the local authority, the Niedersächsisches Landesamt für Verbraucherschutz und Lebensmittelsicherheit [No. 33.14-42502-04-16/2217].

### **Analysis of r/r PDX samples**

End of experiments analysis of relapsed mice was performed with PDX cells isolated when termination criteria were fulfilled. For detection of surface CD22 expression, cells were stained with anti-huCD22-APC (BioLegend, clone HIB22) and anti-huCD45-PE or anti-huCD45-FITC (both BioLegend) according to the reporter fluorescence protein of the respective PDX model. Cells were analyzed in a FACS Calibur flow cytometer and data were analyzed with Cell-Quest Pro software (BD Bioscience). For assessment of MOMP induction by venetoclax and DSB-induction by inotuzumab-ozogamicin cells were subjected to the respective assays (see above).

### **Conversion of murine doses to human equivalent doses**

Human equivalent doses were calculated according to FDA guidelines and Nair and Jacobs<sup>19</sup> with mouse to human conversion factor  $K_m = 0.08$  and a human mg/kg to  $\text{mg/m}^2$  conversion factor of 37. Human body weight between 50 and 100 kg was used for calculation. Human equivalent doses were calculated to 1.6 mg/kg for venetoclax,  $4 \times 0.3 \text{ mg/m}^2$  for inotuzumab-ozogamicin, and 0.08 mg/kg for dexamethasone all within the range of clinical usage, respectively.

### **Statistical Analysis**

Error bars represent SD if not otherwise stated. Statistical analysis was conducted using GraphPad Prism software (Version 7.04) or Microsoft Excel. Student's t-test or

one-way ANOVA with Bonferroni multiple comparison test was used to determine the statistical significance of the results. Kaplan-Meier statistical analysis was performed using log-rank test. P values <0.05 were considered significant.

## References

18. Jungwirth N, Salinas Tejedor L, Jin W, et al. Mesenchymal Stem Cells Form 3D Clusters Following Intraventricular Transplantation. *J Mol Neurosci*. 2018;65(1):60-73.
19. Nair AB, Jacob S. A simple practice guide for dose conversion between animals and human. *J Basic Clin Pharm*. 2016;7(2):27-31.



**Table S1: Clinical data for ALL patients: primary cells and primografts.** \* primo-graft P020; # primograft P021, n.a. : not available ; Primograft L707 has recently been described <sup>13</sup>.

| sample | diagnosis | Presentation/<br>relapse | cytogenetics                                                                                                             | CD22<br>surface<br>expression<br>(%) | age at<br>presentation | gender |
|--------|-----------|--------------------------|--------------------------------------------------------------------------------------------------------------------------|--------------------------------------|------------------------|--------|
| 019    | pro-B-ALL | relapse                  | n.a.                                                                                                                     | 23.2                                 | 39                     | male   |
| 020*   | c-ALL     | relapse                  | 55,XY,+1,dup(4)(q22.1q22.1),+6,+8,inv(8)(q21.1q24),del(9)(p21.3),+10,+11q,+14,+18,+19,+21,+X                             | 73.9                                 | 41                     | male   |
| 021#   | pre-B-ALL | relapse                  | 46,XY,der(1)t(1;19)(q23.3;p13.3),dup(1)(q23.3qter),der(6)t(6;7)(q12;q21.3)del(6)(q12qter),dup(7)(q21.3qter)del(9)(p13.2) | 59.5                                 | 37                     | male   |
| 029    | pro-B-ALL | relapse                  | 46 XY,<br>t(11;19)(q23;p13)                                                                                              | 24.0                                 | 37                     | male   |
| L05    | pro-B-ALL | presentation             | 46,XX, t(4;11)                                                                                                           | n.a.                                 | 73                     | female |
| L20    | c-ALL     | presentation             | t(9;22) (q34;q11)<br>(p210)                                                                                              | n.a.                                 | 59                     | female |
| 036    | c-ALL     | presentation             | 46, XY                                                                                                                   | 28.8                                 | 67                     | male   |
| 037    | c-ALL     | presentation             | 45,XY,-9,<br>t(9;22)(q34;q11)<br>(p190)                                                                                  | 37.9                                 | 70                     | male   |
| L707   | ALL       | presentation             | t(17;19)                                                                                                                 | 92.1                                 | 16                     | female |

**Supplemental Figure 1: S1A:** Representative flow cytometric analysis of TMRE mean fluorescence. BV173 cells were treated for 3 hours with 1000 nM venetoclax (VEN) and were subsequently stained with 50 nM TMRE for 20 minutes. The ionophore FCCP served as positive destaining control. Side scatter (SSC) is plotted against TMRE fluorescence.

**S1B:** Representative flow cytometric analysis of  $\gamma$ H2AX and pATM expression. 697 cells were treated for 6 hours with 100 ng/ml INO and subsequently fixed and stained with anti- $\gamma$ H2AX and anti-pATM.  $\gamma$ -irradiation (4 Gy) served as positive control. PI-A is plotted against  $\gamma$ H2AX (upper) and pATM (lower) fluorescence, respectively.

**S1C:** MOMP induction of 697 and BV173 cells treated for 3 hours with 1000 nM VEN. Viable cells were gated based on FSC/SSC profile and MFI of untreated cells was set as 100%. Values are expressed as means  $\pm$  SD. p-values were calculated by one-way ANOVA with Bonferroni correction. (\*\*p<0.01; \*\*\*p<0.001).

**S1D and E:** Flow cytometric analysis of **(D)** pATM and **(E)**  $\gamma$ H2AX-expression of 697 and BV173 cells treated for 6 hours with 250 nM VEN, 5000 nM DEX (697) or 1000 nM DEX (BV173) or 100 ng/ml INO. Values are expressed as means  $\pm$  SD. p-values were calculated by one-way ANOVA with Bonferroni correction. (\*\*p<0.01; \*\*\*p<0.001).

**S1F and G:** Flow cytometric analysis for **(F)** PI negativity (rel. viability) and **(G)** cleaved-caspase 3 expression of P020, P021 and L707 PDX cells treated for 6 hours with VEN (P020: 250 nM ; P021: 1000 nM ; L707: 250 nM), DEX (P020: 1  $\mu$ M; P021: 5  $\mu$ M ; L707: 1  $\mu$ M) or INO: (P020: 100 ng/ml; P021: 100 ng/ml; L707: 1000 ng/ml), respectively. **(G)** Cells were fixed, permeabilized and stained with an anti-cleaved caspase 3 antibody. Values are expressed as means  $\pm$  SD. p-values were calculated by one-way ANOVA with Bonferroni correction. (\*\*p<0.01; \*\*\*p<0.001).

**S1H and I:** Flow cytometric analysis of **(H)** PI-negativity (rel. viability) and **(I)** cleaved caspase 3- expression of 697 and BV173 cells treated for 6 hours with 250 nM VEN, 5000 nM DEX (697) or 1000 nM DEX (BV173) or 100 ng/ml INO, respectively. Values are expressed as means  $\pm$  SD. p-values were calculated by one-way ANOVA with Bonferroni correction. (\*\*p<0.01; \*\*\*p<0.001).

**S1J:** BCL2 immunoprecipitations from lysates from 697 and BV173 cells treated with or without DEX and INO for 24 hours. Ratios of BIM/BCL2 were calculated for three experiments with the BIM/BCL2 ratio of 1 for untreated cells. P-values were calculated by student's t-test (\*p<0.05)

**S1K:** IC50 of INO, VEN and DEX in combination treatment. Primary ALL samples and PDX cells were treated with INO, VEN and DEX alone or in combination in fixed ratios (for primary samples: 1 nM: 1 nM: 0.0067 nM; for PDX samples: 100 nM: 8.43 nM: 0.0029 nM) for 48 hours followed by CD19 antibody and PI staining. IC50s of INO, VEN and DEX in the triple agent combination treatment (VEN/DEX/INO) were determined by CompuSyn software.

**S1L:** PBMNCs from healthy donors (n=3) in co-culture with MSCs were incubated with 1000 nM VEN, 1000 nM DEX, and 1000 ng/ml INO or as triple combination (VEN/DEX/INO) for 48 hours followed by PI staining.

**S2A-C:** Surface CD22 expression in human CD45<sup>+</sup> cell population of relapsed/refractory (A) L707, (B) P020 and (C) P021 PDX cells. R/r ALL mice were sacrificed at the end of experiment with severe leukemia when termination criteria were fulfilled, and r/r ALL cells were harvested. Values are expressed as means  $\pm$  SD. p-values were calculated by one-way ANOVA with Bonferroni correction. (\*\*p<0.01; \*\*\*p<0.001).

**S2D and E:** MOMP induction in r/r L707 and P021 cells. Cells were treated for 3 hours with 1000 nM VEN. Viable cells were gated based on FSC/SSC profile and MFI of untreated cells was set as 100%. Cells were >95% positive for human CD45. Values are expressed as means  $\pm$  SD. p-values were calculated by one-way ANOVA with Bonferroni correction.

**S2F and G:** Flow cytometric analysis of  $\gamma$ H2AX expression of r/r L707 and P021 PDX cells treated for 6 hours with 1000 ng/ml INO. Values are expressed as means  $\pm$  SD. p-values were calculated by one-way ANOVA with Bonferroni correction.

Supplemental Figure 1

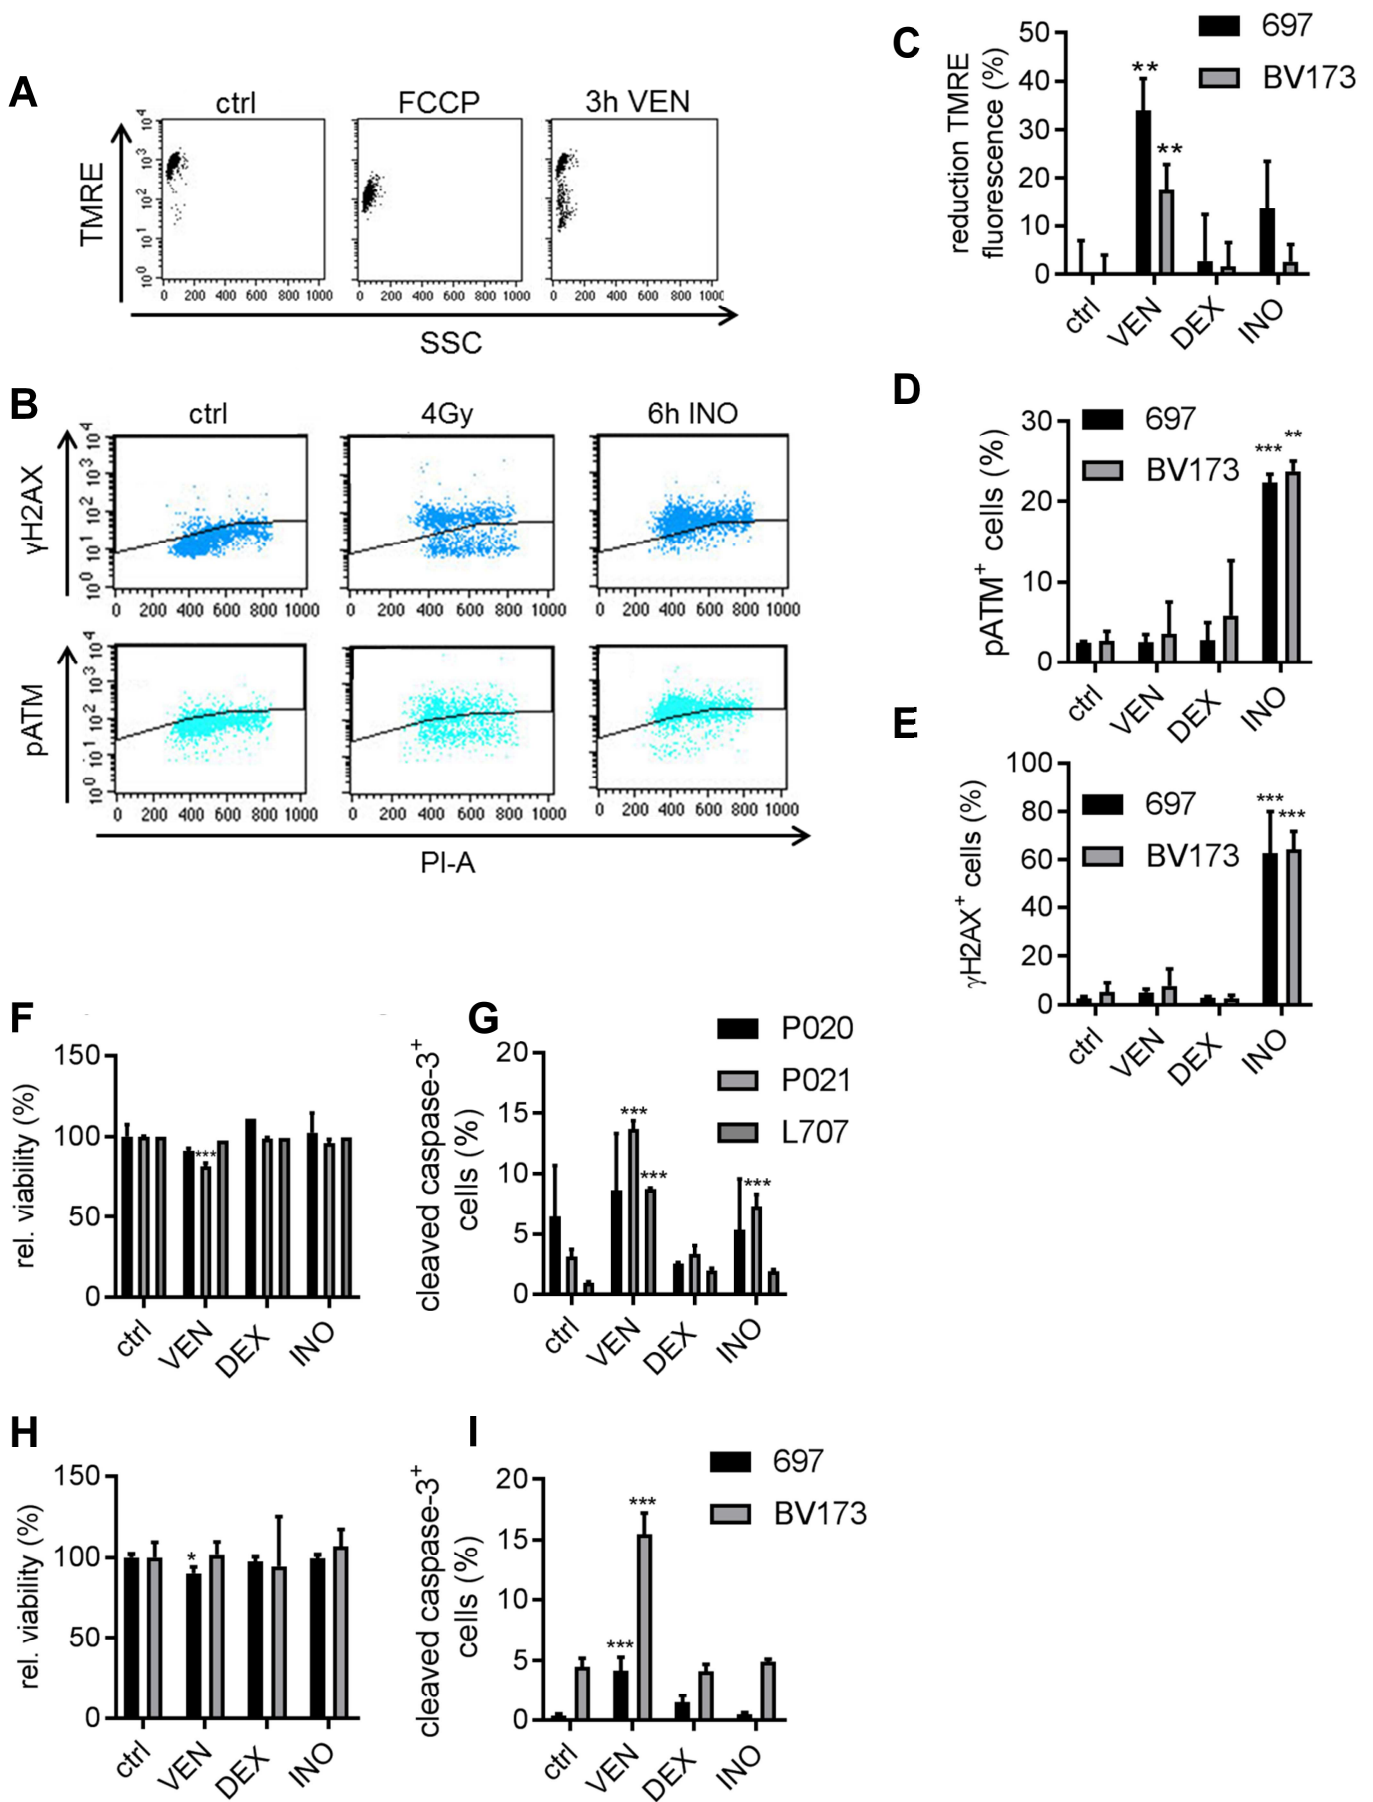



Supplemental Figure 2

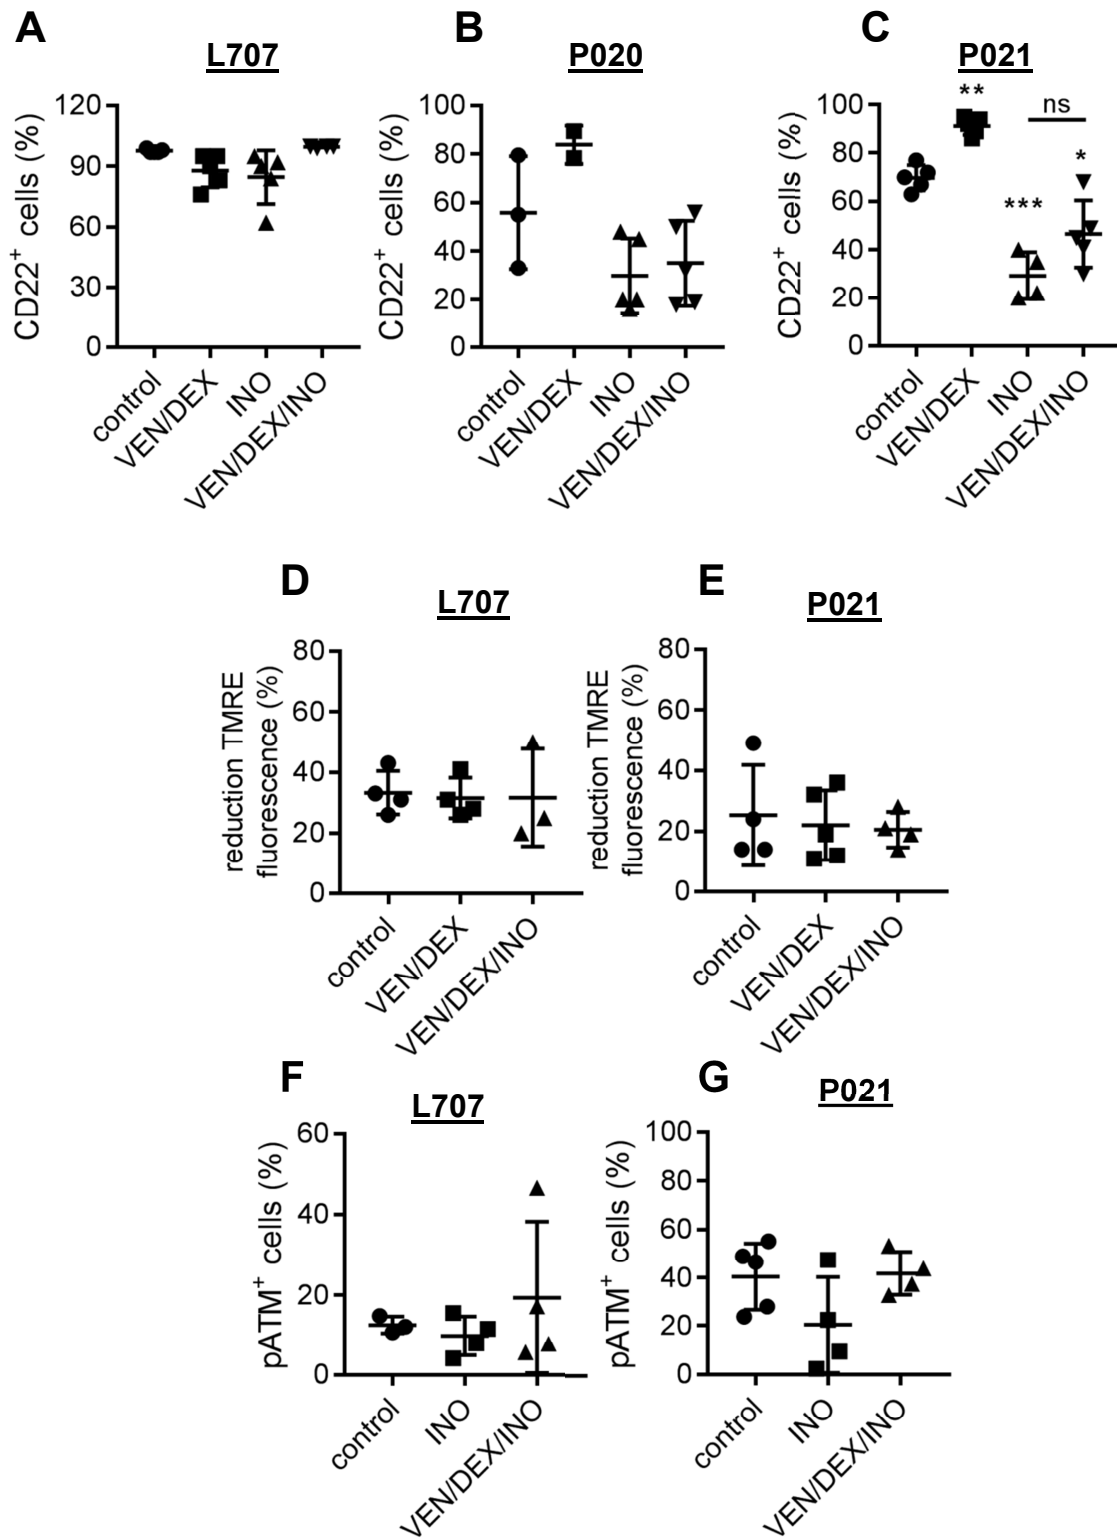

Supplement: bloodBLD2020008544-suppl1.pdf [file bloodBLD2020008544-suppl1.pdf]
